# Supplementary material for: Respiratory Syncytial Virus Vaccines: Analysis of Pre-Marketing Clinical Trials for Immunogenicity in the Population over 50 Years of Age
Source: MDPI journal article supplement (doi:10.3390/vaccines12040353), 2024-03-25
Supplement: s1 [file s1]

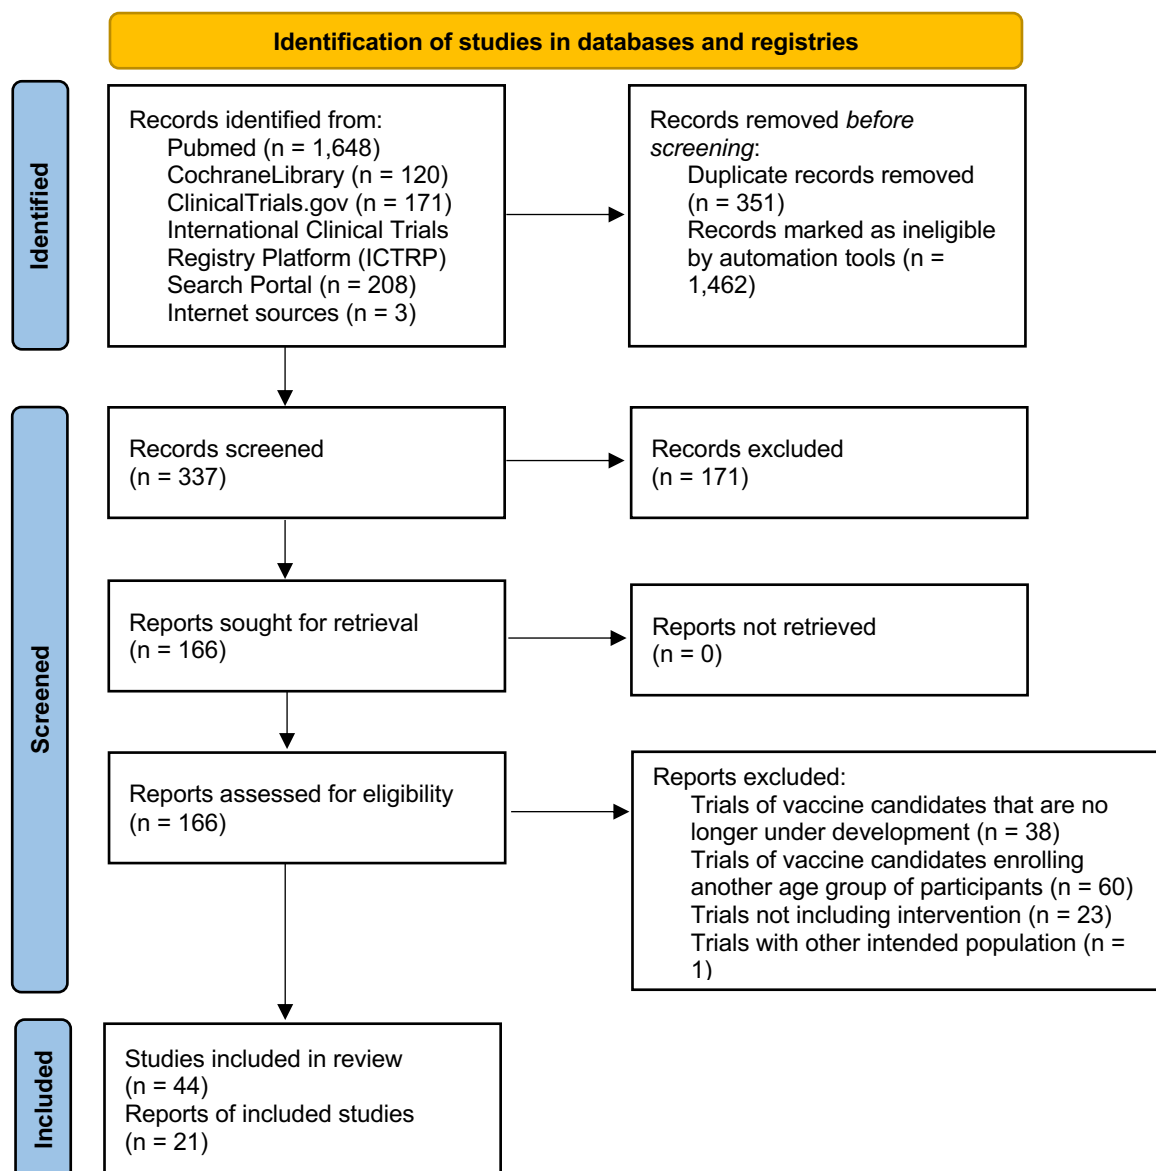

**File S1. Modified PRISMA 2020 flow diagram.**

From: Page MJ, McKenzie JE, Bossuyt PM, Boutron I, Hoffmann TC, Mulrow CD, et al. The PRISMA 2020 statement: an updated guideline for reporting systematic reviews. *BMJ* 2021;372:n71. doi: 10.1136/bmj.n71

For more information, visit: <http://www.prisma-statement.org/>
